# Supplementary material for: Genome-Wide Association Study of d-Amphetamine Response in Healthy Volunteers Identifies Putative Associations, Including Cadherin 13 (CDH13)
Source: PubMed Central journal article supplement (PMC3429486; doi:10.1371/journal.pone.0042646), 2012-08-28

# F1

## A

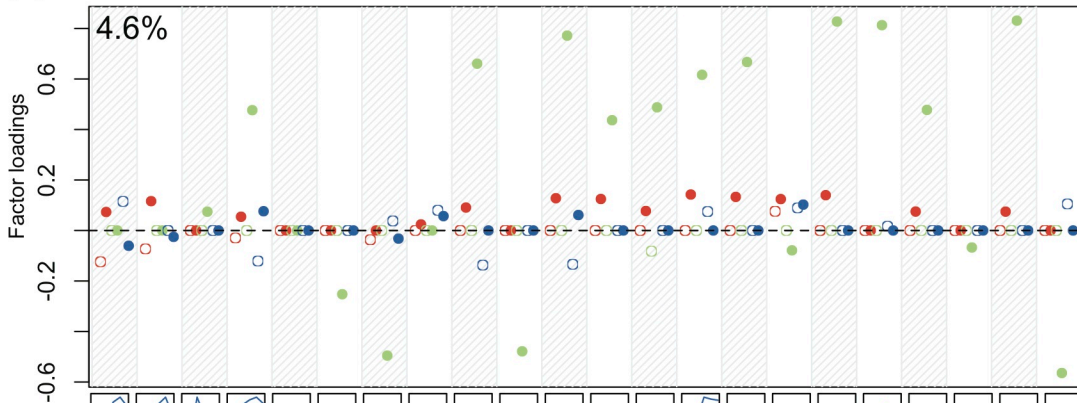

## B

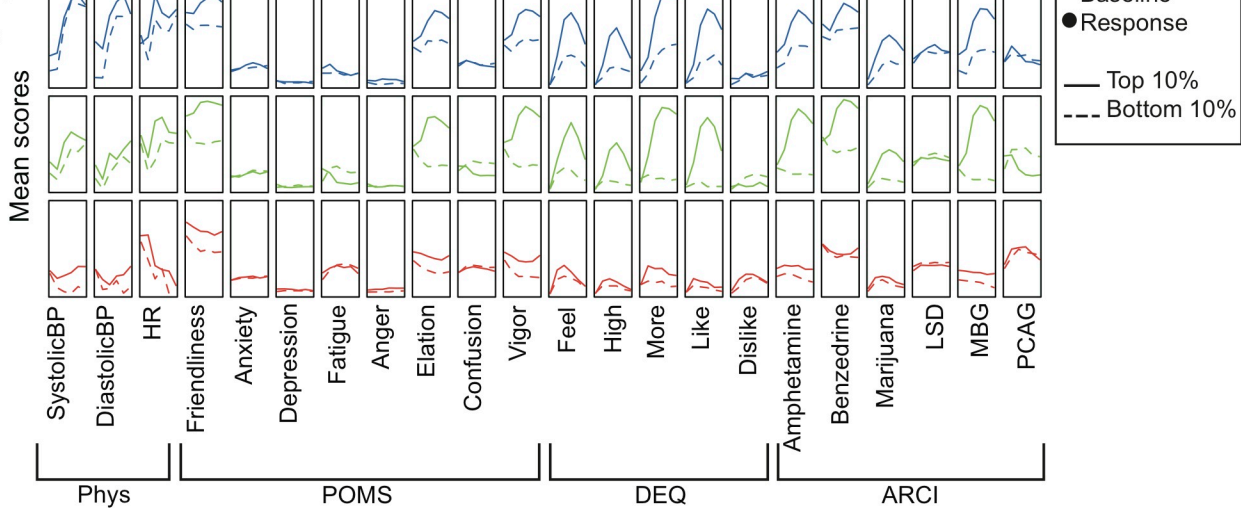

## C

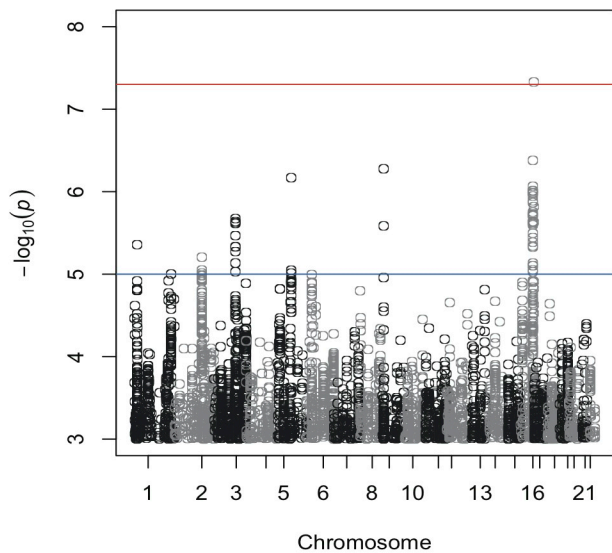

## D

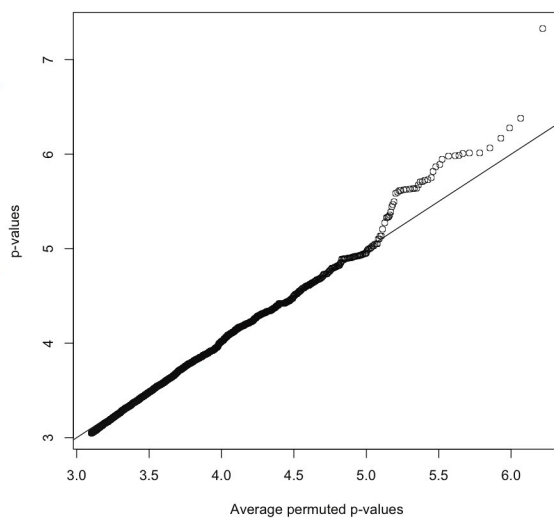

# F2

**A**

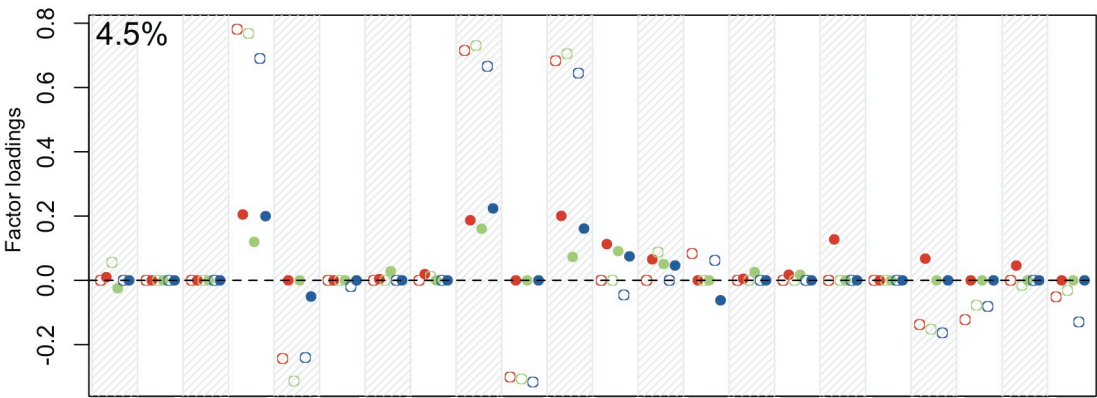

**B**

Mean scores

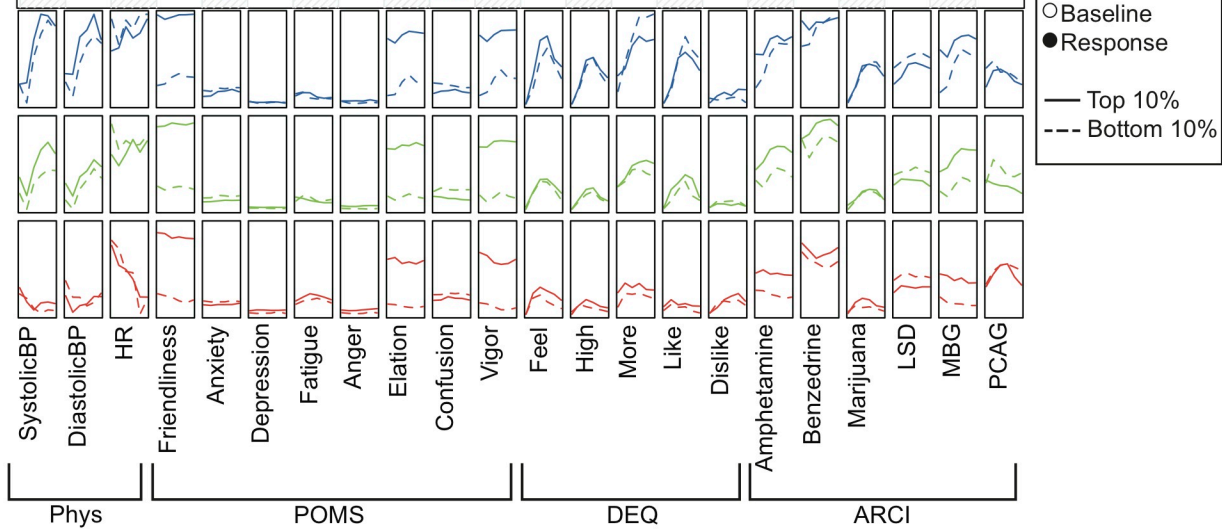

**C**

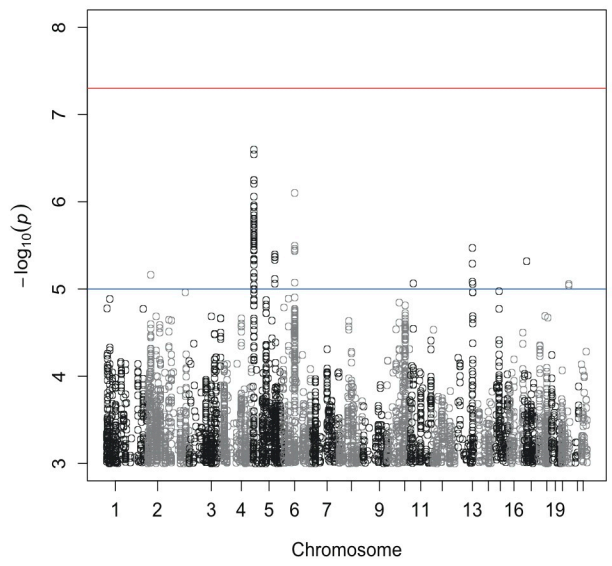

**D**

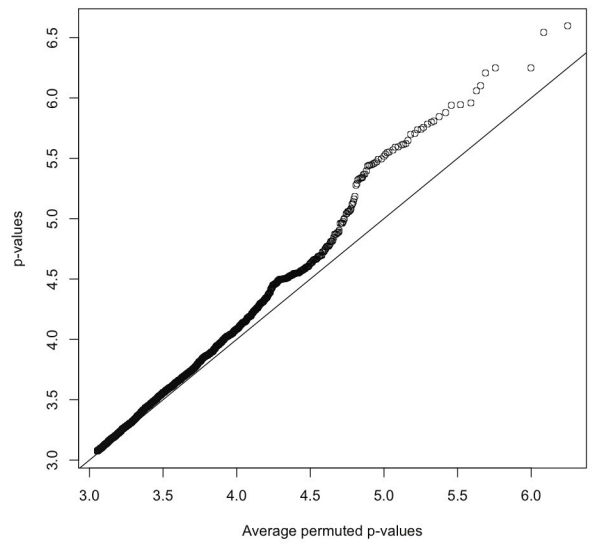

# F3

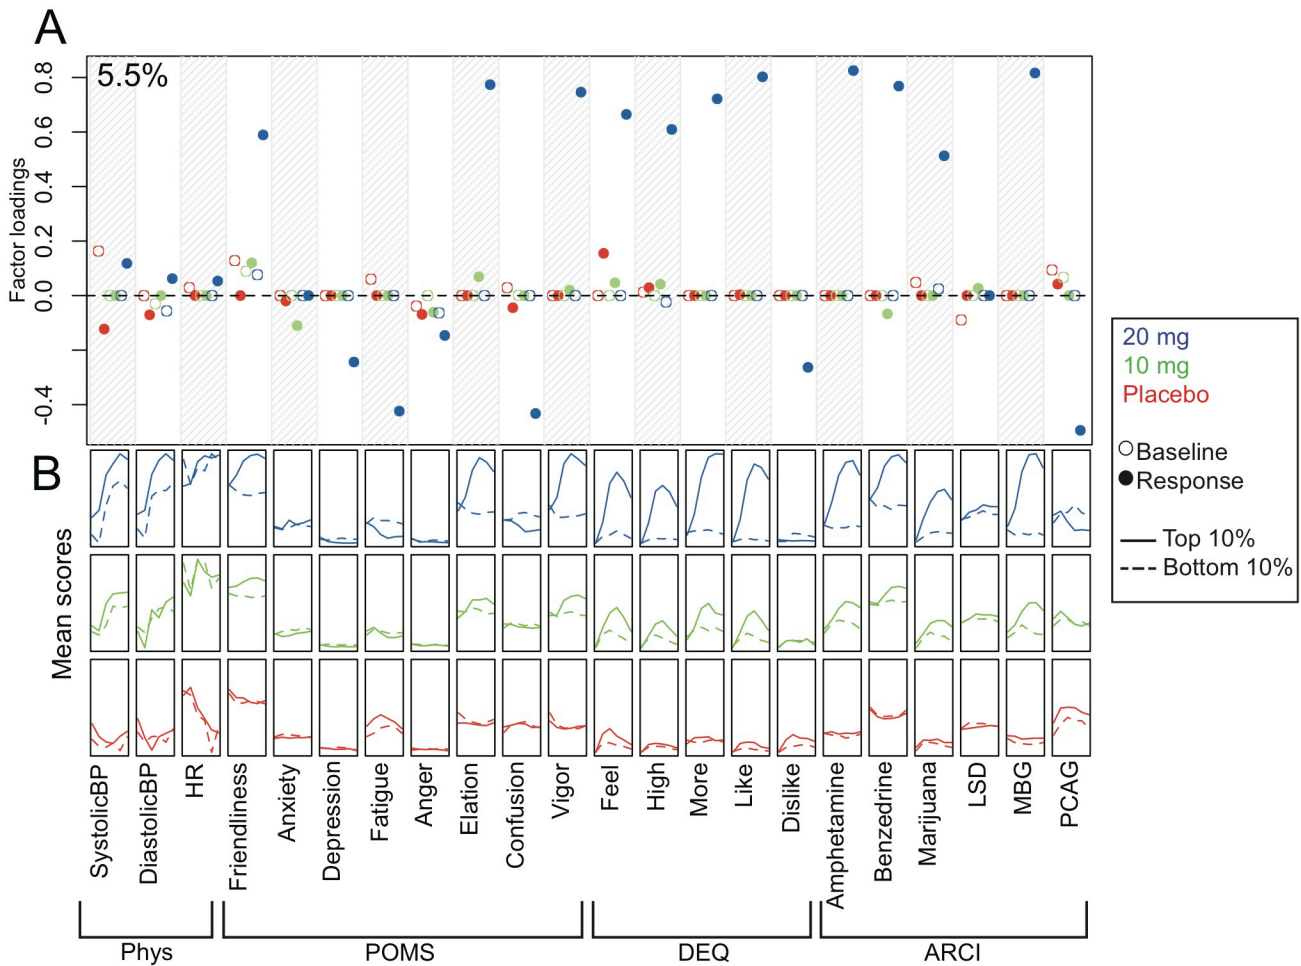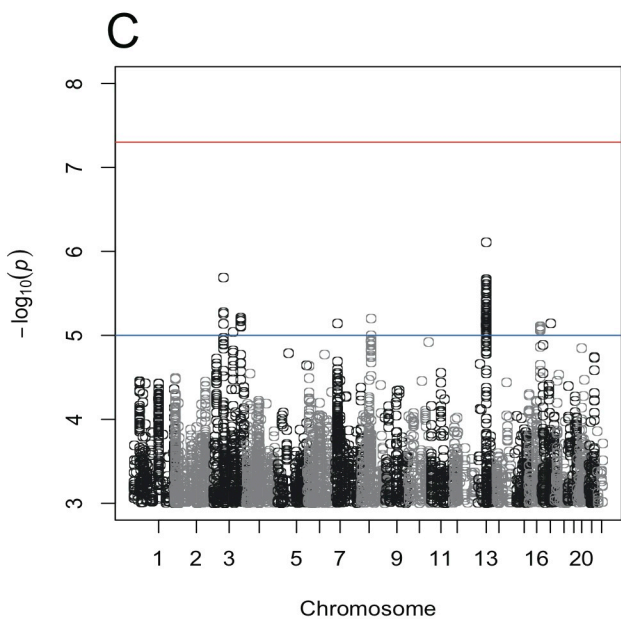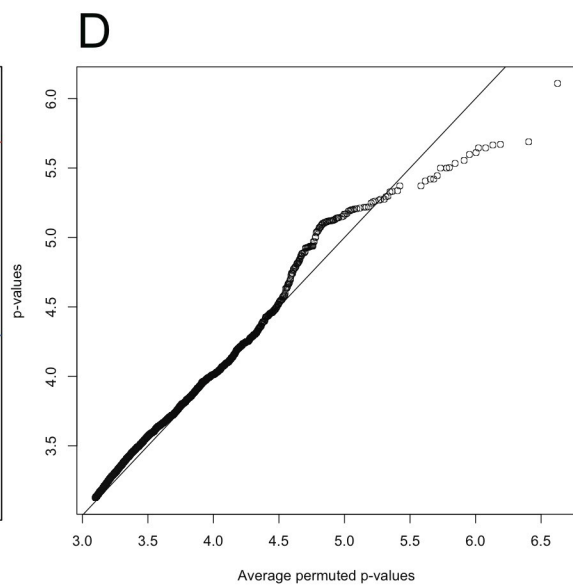

# F4

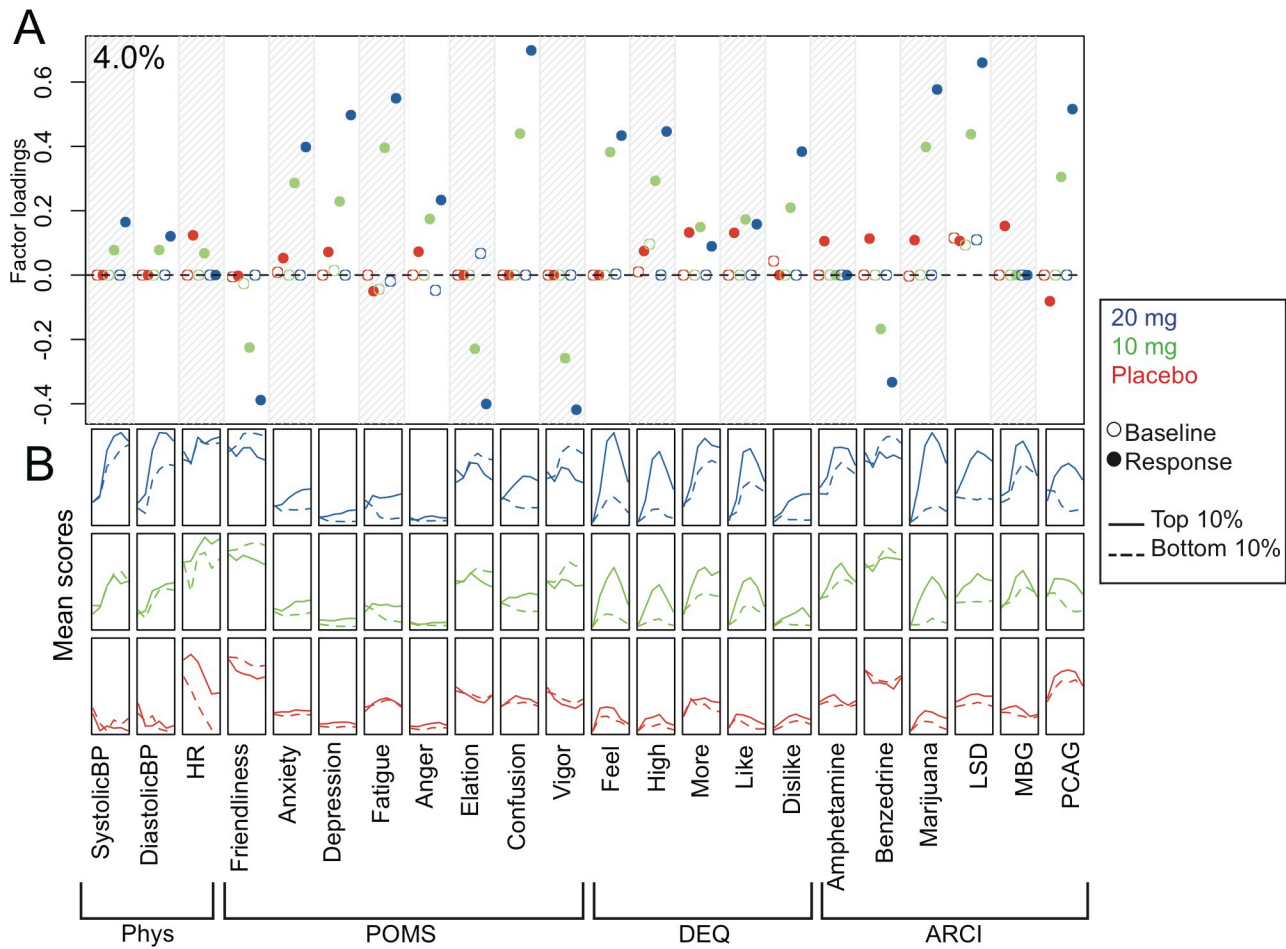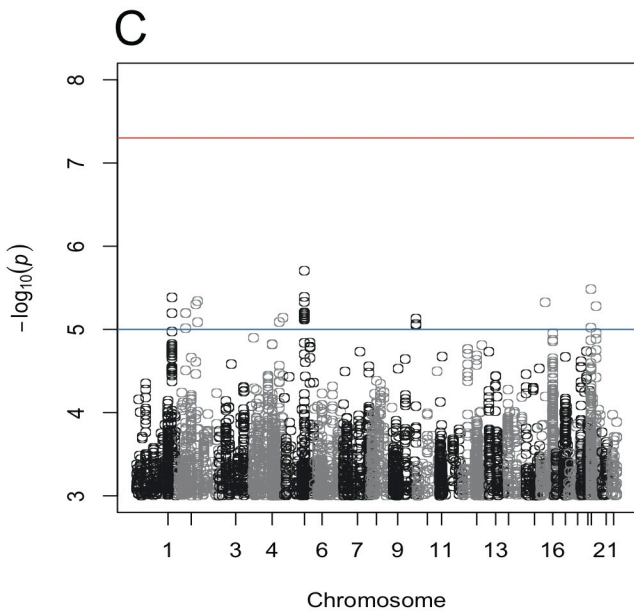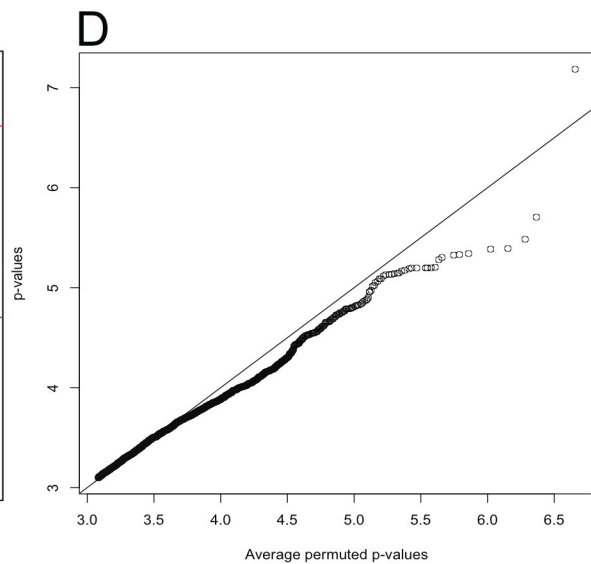



# F5

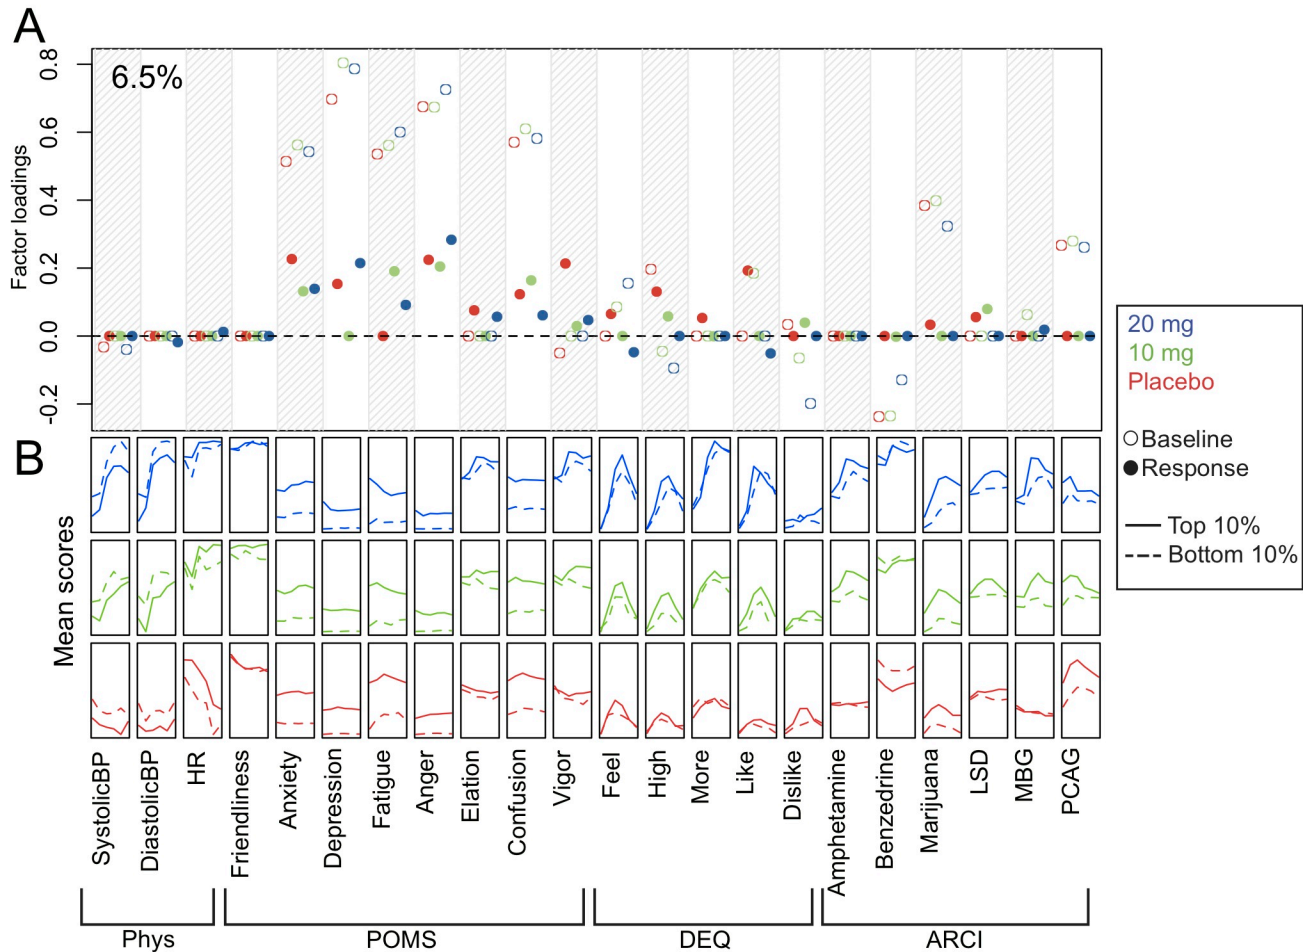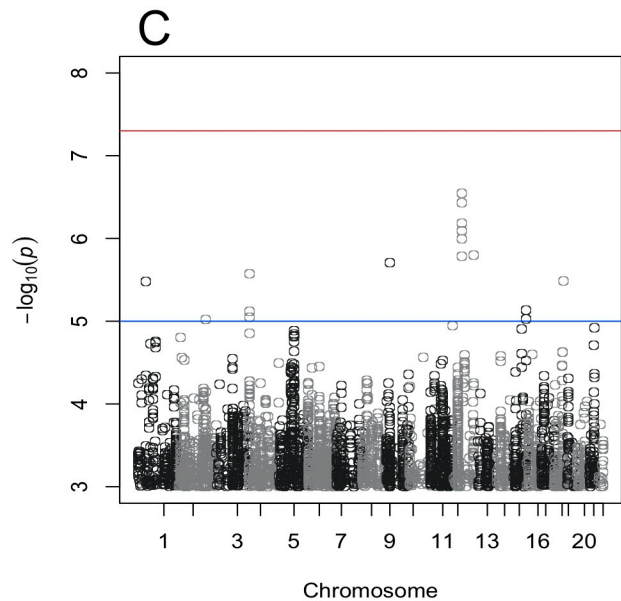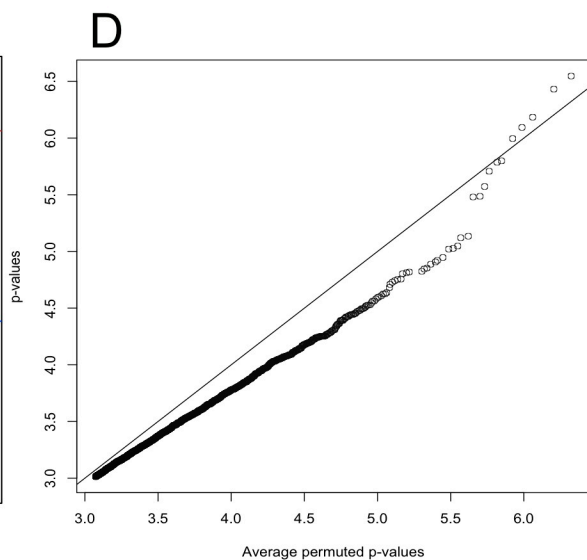

# F6

## A

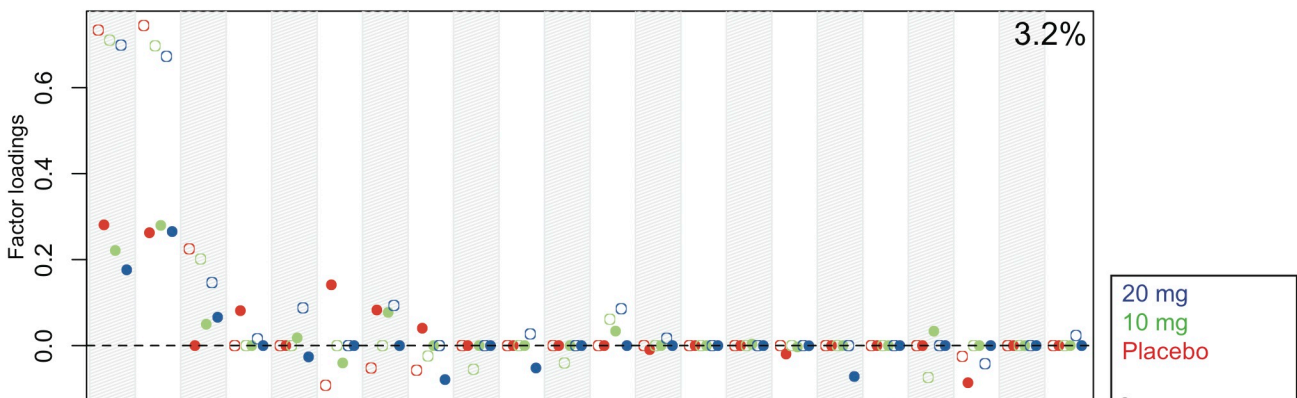

## B

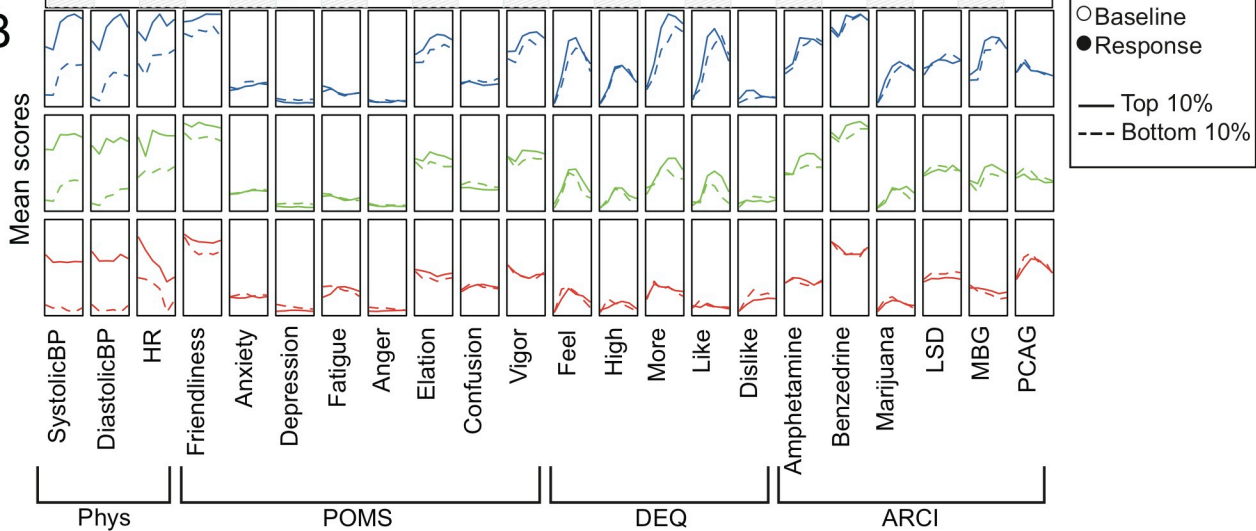

## C

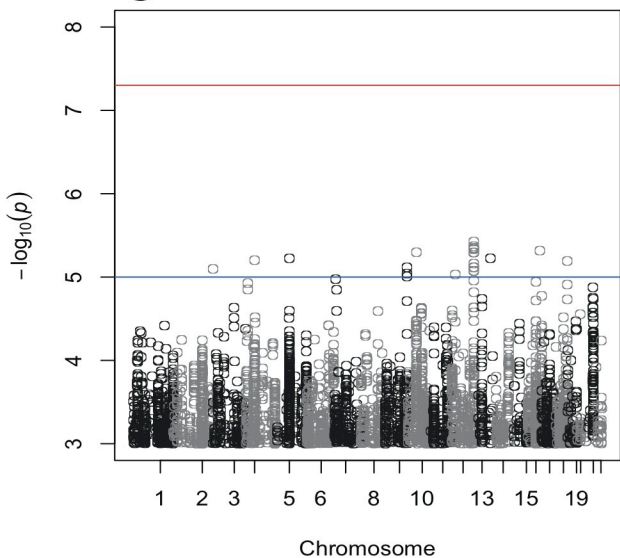

## D

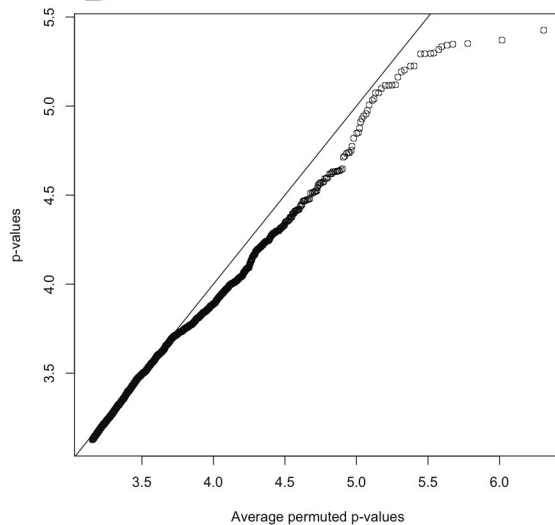

# F7

**A**

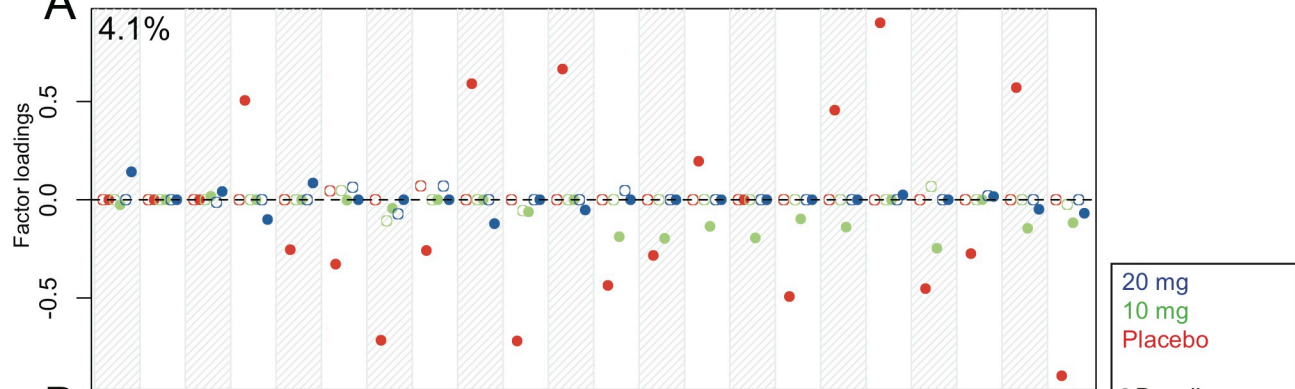

**B**

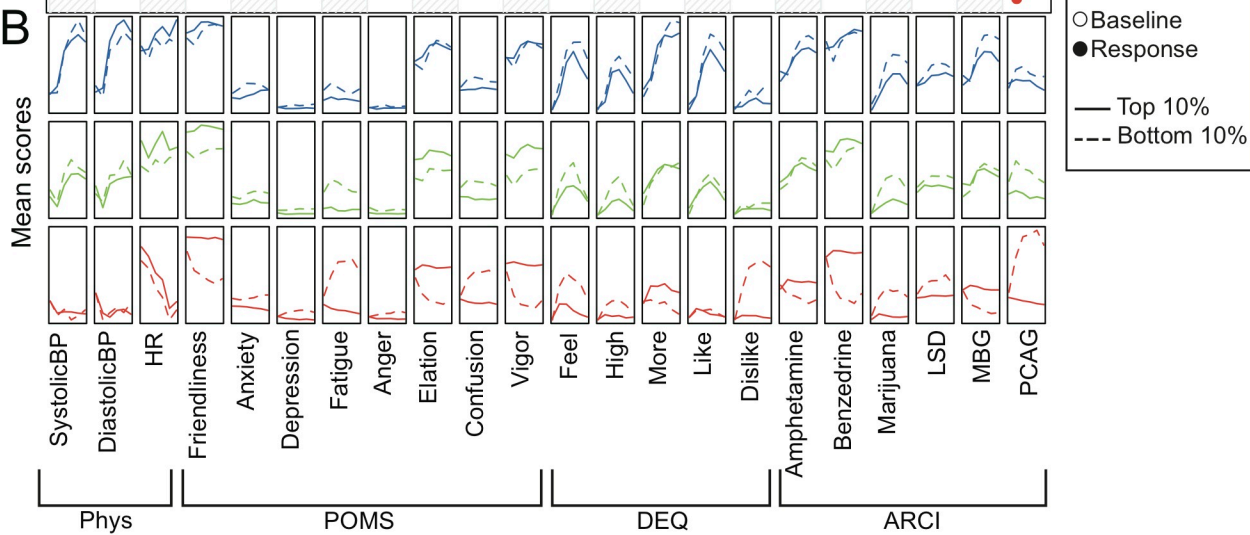

**C**

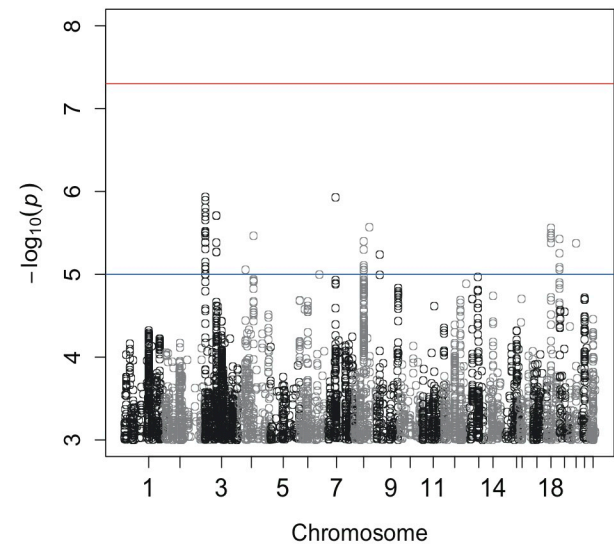

**D**

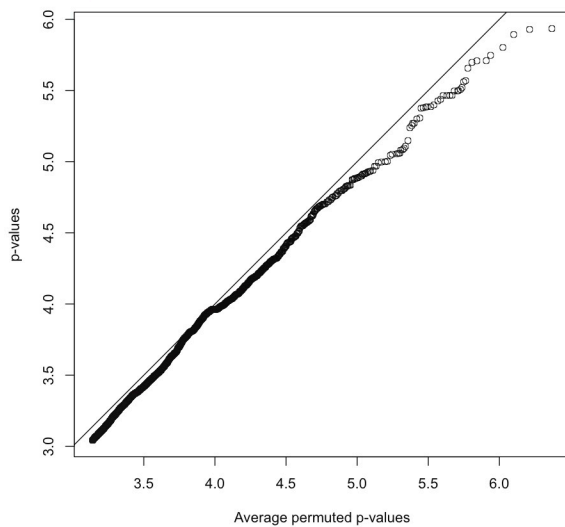

# F8

**A**

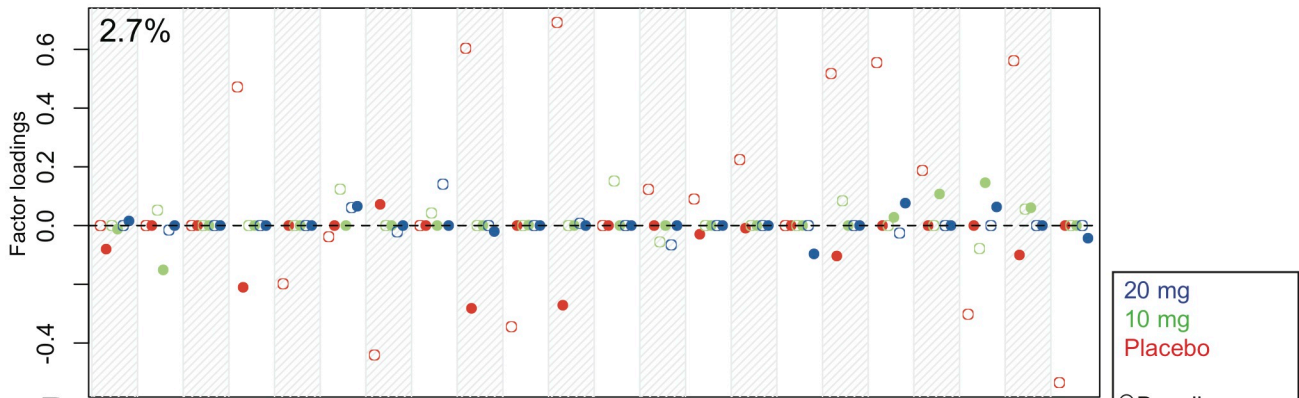

**B**

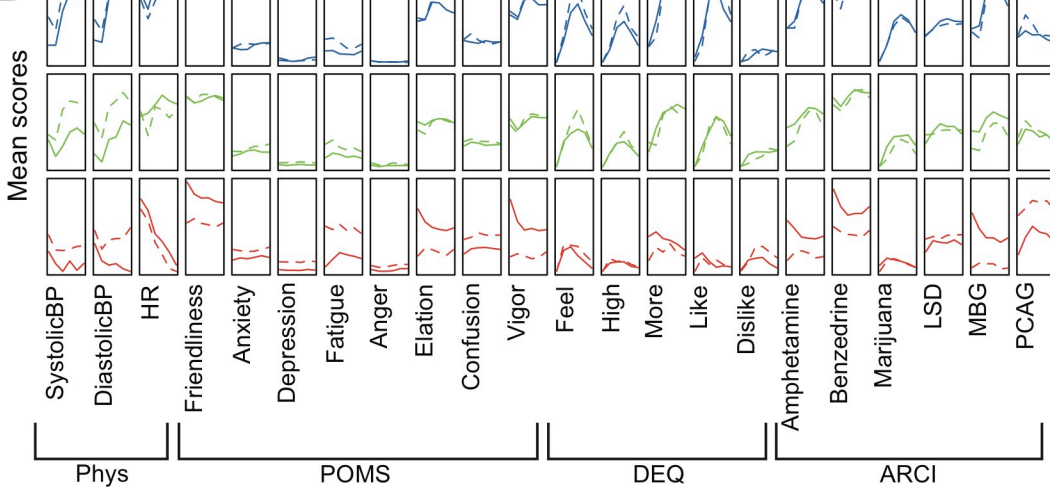

**C**

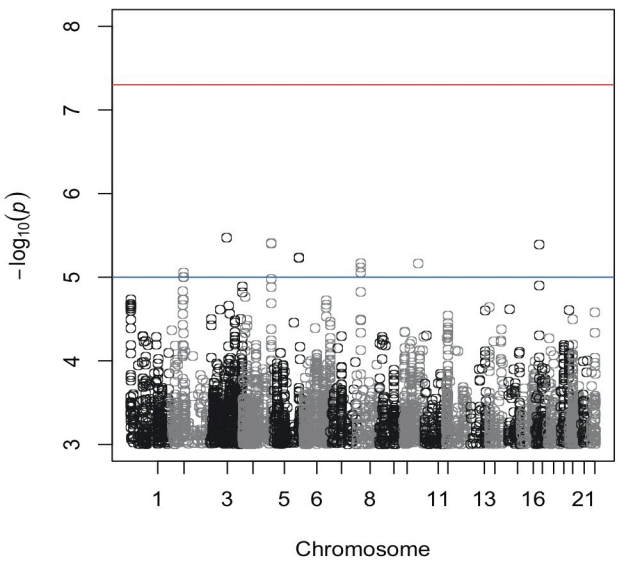

**D**

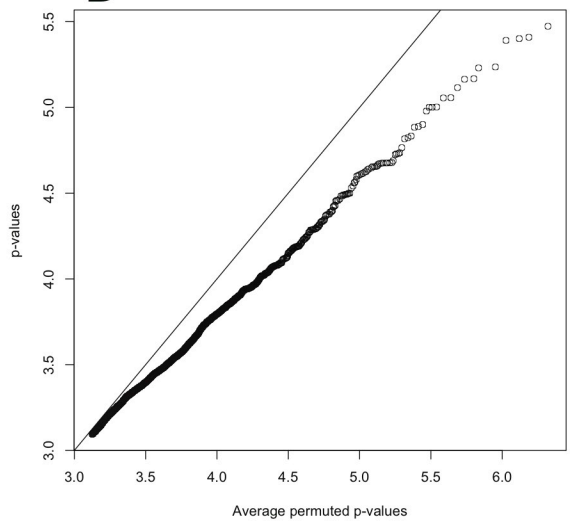



# F9

## A

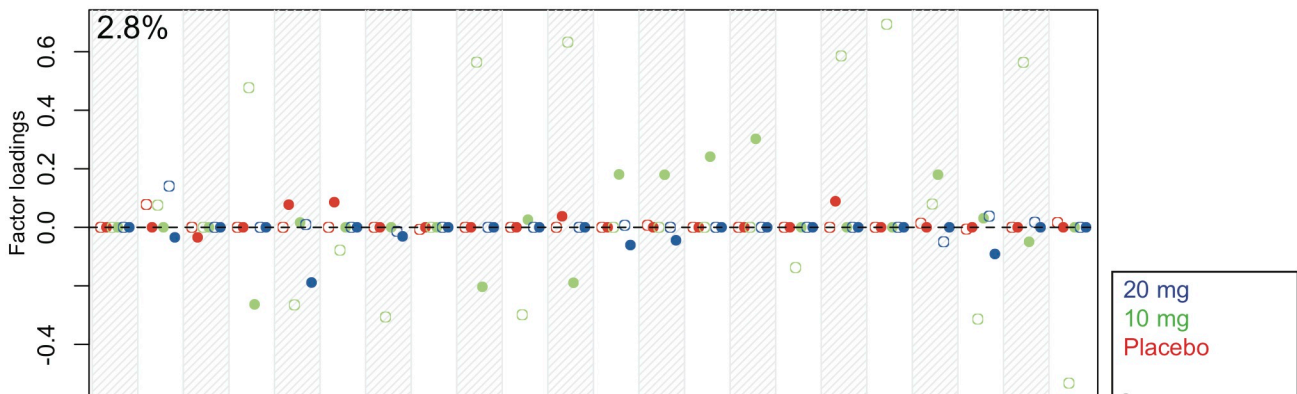

## B

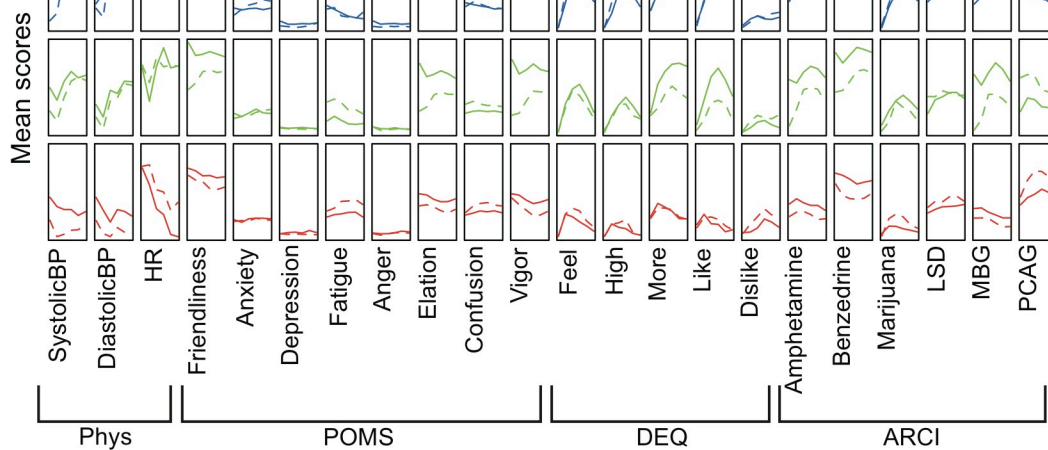

## C

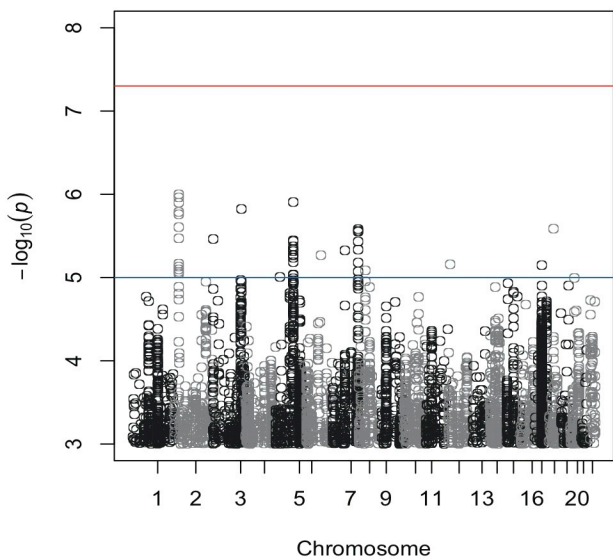

## D

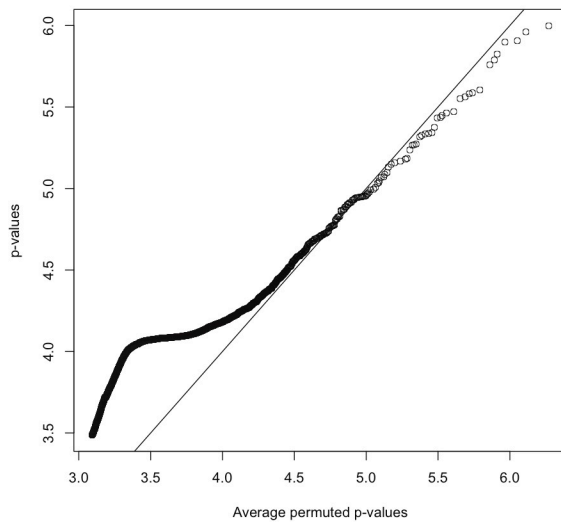

# F10

## A

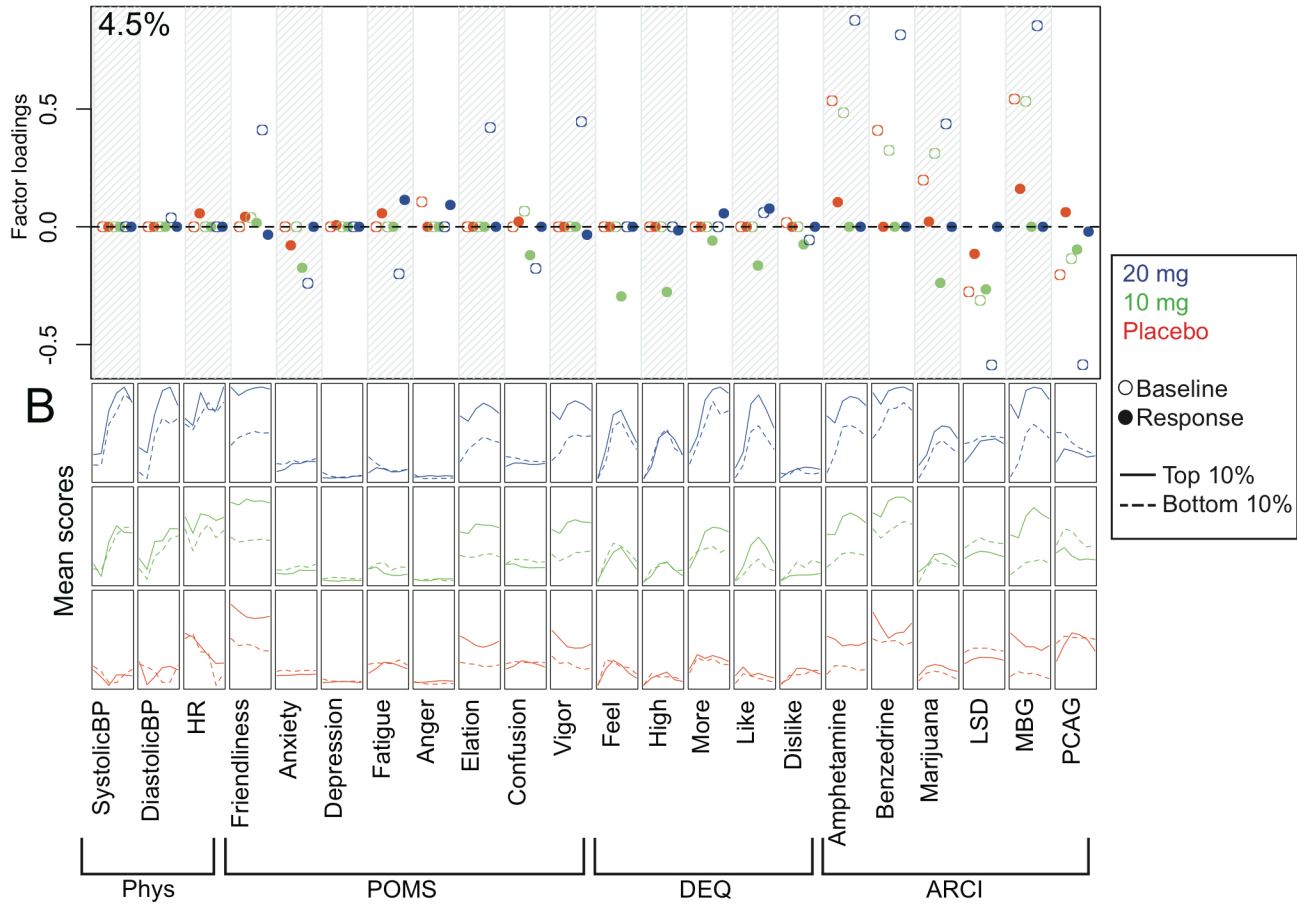

## B

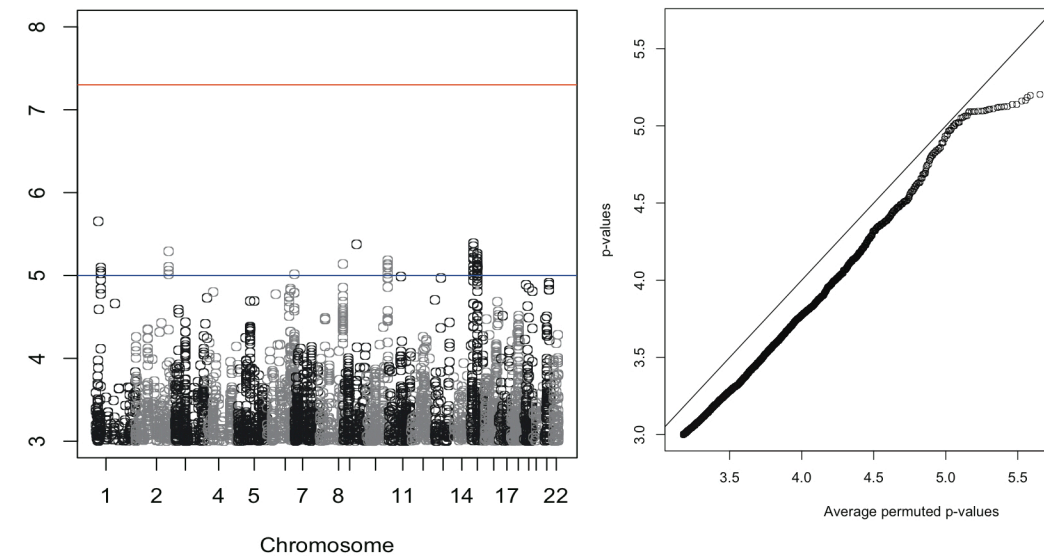

## C

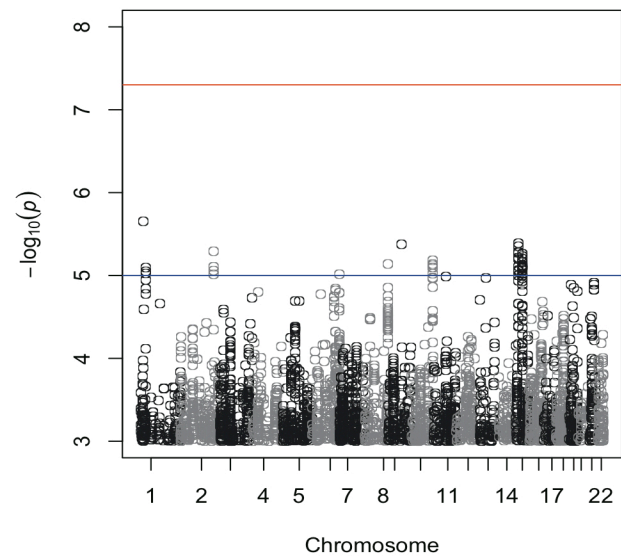

## D

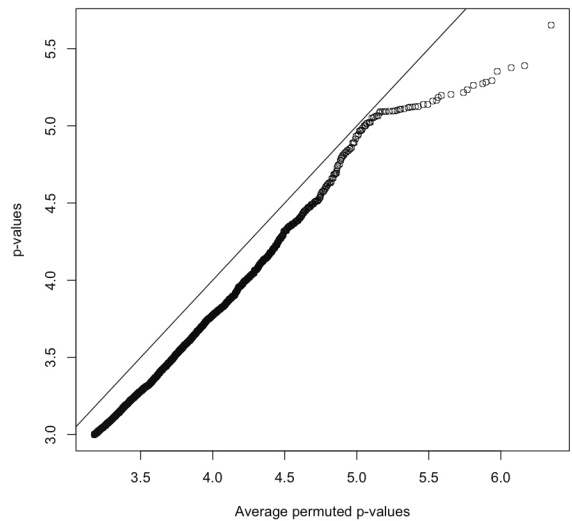

Supplement: pone.0042646.s002.pdf [file pone.0042646.s002.pdf]
