# Supplementary material for: Genome-Wide Association Study of d-Amphetamine Response in Healthy Volunteers Identifies Putative Associations, Including Cadherin 13 (CDH13)
Source: PubMed Central journal article supplement (PMC3429486; doi:10.1371/journal.pone.0042646), 2012-08-28

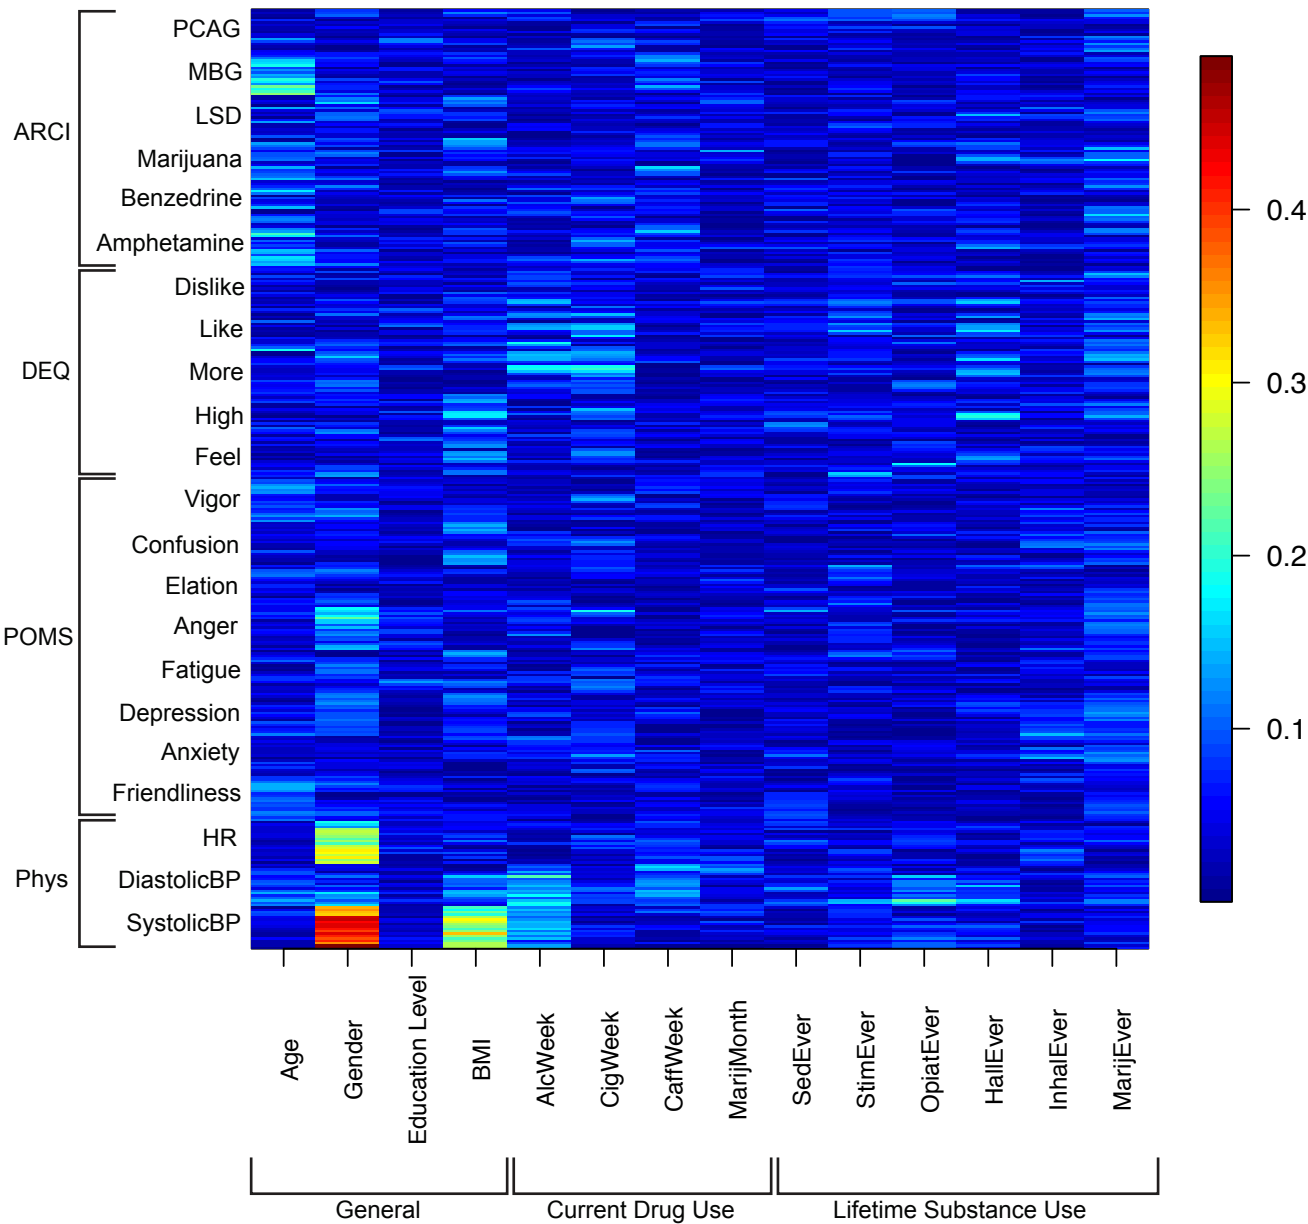

Supplement: pone.0042646.s001.pdf [file pone.0042646.s001.pdf]
